# Supplementary material for: Integrating network pharmacology and an experimental validation strategy elucidates the protective effect and mechanism of callicarpa nudiflora against neuroinflammation
Source: Royal Society of Chemistry journal article supplement (doi:10.1039/d2ra05143e), 2022-01-01
Supplement: d2ra05143e1.pdf [file d2ra05143e1.pdf]

## Supplementary Material

### 1 Supplementary Tables

**Supplementary Table 1. 26 active compounds screened by ADMET.**

| Name    | HIA_Level | Solubility_Level | BBB_Level | Hepatotoxic#MDpvalue | PPB#MDpvalue |
|---------|-----------|------------------|-----------|----------------------|--------------|
| Call.01 | 6.1261    | -2.66647         | 0.92298   | 0.0236195            | 0.188386     |
| Call.02 | 6.351489  | -3.249539        | 0.92298   | 0.0736195            | 0.188386     |
| Call.03 | 7.461447  | -3.0706032       | 0.7414    | 1.13E-02             | 4.14E-01     |
| Call.04 | 8.621673  | -2.351489        | 0.792298  | 0.0407989            | 0.840937     |
| Call.05 | 9.314668  | -1.0461447       | 0.892298  | 6.91E-02             | 0.18738      |
| Call.06 | 10.963553 | -3.0621673       | 0.96977   | 3.48E-02             | 0.171421     |
| Call.07 | 9.0054175 | -2.314668        | 0.96977   | 0.0176202            | 0.958889     |
| Call.08 | 7.70502   | -1.963553        | 0.96977   | 0.174918             | 0.184752     |
| Call.09 | 6.8858    | -2.0954175       | 0.96977   | 6.91E-02             | 1.92E-01     |
| Call.10 | 6.92212   | -1.0770502       | 0.725769  | 3.48E-02             | 0.262356     |
| Call.11 | 7.0179    | -3.368858        | 0.8450619 | 0.0176518            | 0.302343     |
| Call.12 | 6.18676   | -2.0126922       | 0.9498591 | 2.27E-02             | 0.192752     |
| Call.13 | 6.14747   | -1.00170179      | 0.8174143 | 2.27E-02             | 0.192752     |
| Call.14 | 6.590082  | -0.000618676     | 0.881956  | 0.0933375            | 0.3533643    |
| Call.15 | 6.144284  | -6.14747E-05     | 0.934849  | 0.0560181            | 0.781068     |
| Call.16 | 6.14747   | -3.00590082      | 0.734849  | 0.0560181            | 0.781068     |
| Call.17 | 7.203918  | -1.0144284       | 0.964959  | 0.0560181            | 0.781068     |
| Call.18 | 7.88545   | -6.14747E-05     | 0.884849  | 0.0407773            | 0.333518     |
| Call.19 | 8.144905  | -0.0203918       | 0.934994  | 0.195732             | 0.316632     |
| Call.20 | 9.216313  | -0.000788545     | 0.986859  | 0.17015              | 0.166551     |
| Call.21 | 9.63553   | -0.00144905      | 0.870969  | 0.775741             | 0.400007     |
| Call.22 | 9.54175   | -0.00216313      | 0.804049  | 0.790305             | 0.441486     |
| Call.23 | 7.70502   | -0.00273525      | 0.88863   | 1.41E-02             | 1.83E-01     |
| Call.24 | 6.368858  | -0.249539        | 0.954849  | 3.48E-02             | 0.201421     |
| Call.25 | 6.126922  | -0.99715         | 0.82484   | 0.0407989            | 0.282328     |
| Call.26 | 6.170179  | -0.174298        | 0.835969  | 0.0162439            | 0.156471     |

**Supplementary Table 2. The information of the potential active compounds in CN**

| No.    | Molecular Name                                                              | Molecular Formula                              | Molecular Weight | Structure                                                                             |
|--------|-----------------------------------------------------------------------------|------------------------------------------------|------------------|---------------------------------------------------------------------------------------|
| Call.1 | Nudiflophenes C                                                             | C <sub>21</sub> H <sub>30</sub> O <sub>4</sub> | 346.21           | 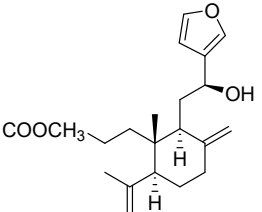   |
| Call.2 | Ent-3,4-seco-16-hydroxy-12,15-epoxy-4(18),8(17),12,14-labdatrien-3-oic acid | C <sub>20</sub> H <sub>28</sub> O <sub>4</sub> | 332.20           |    |
| Call.3 | 3,4-Seco-12R,13S-dihydroxy-4(18),8(17),14(15)-labdatrien-3-oic acid         | C <sub>20</sub> H <sub>32</sub> O <sub>4</sub> | 336.23           |   |
| Call.4 | Callicarpaolide                                                             | C <sub>20</sub> H <sub>28</sub> O <sub>4</sub> | 332.20           |  |
| Call.5 | Callicarpic acid                                                            | C <sub>20</sub> H <sub>28</sub> O <sub>4</sub> | 266.19           |  |

Call.6

Callicarpic acid A

C<sub>20</sub>H<sub>28</sub>O<sub>4</sub>

332.20

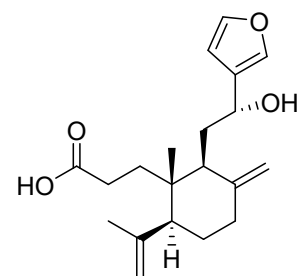

Call.7

Ent-3,4-seco-14-carbonyl-15,16-epoxy-4(18),8(17),13(14)-labdatrien-3-oic acid

C<sub>20</sub>H<sub>28</sub>O<sub>4</sub>

332.20

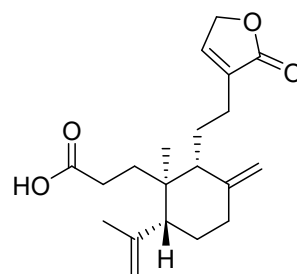

Call.8

Ent-3,4-seco-12R,15-epoxy-4(18),8(17),13-labdatrien-3-oic acid

C<sub>21</sub>H<sub>30</sub>O<sub>4</sub>

346.21

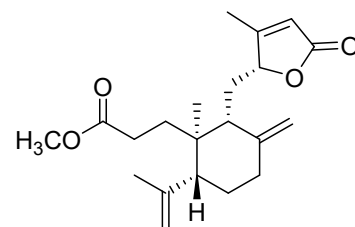

Call.9

7 $\alpha$ -Hydroxy sandaracopimaric acidC<sub>20</sub>H<sub>30</sub>O<sub>3</sub>

318.22

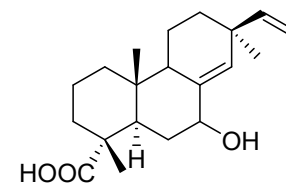

Call.10

Methylcallicarpate

C<sub>21</sub>H<sub>30</sub>O<sub>4</sub>

346.21

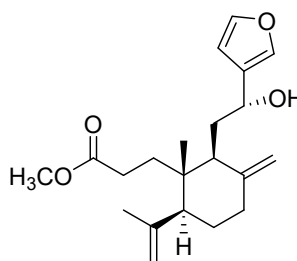

Call.11  
Syn-3,4-seco-12R-  
hydroxy-15,16-epoxy-  
4(18),8(17),13  
(16),14(15)-labdatetraen-  
3-oic acid

C<sub>20</sub>H<sub>28</sub>O<sub>4</sub>

332.20

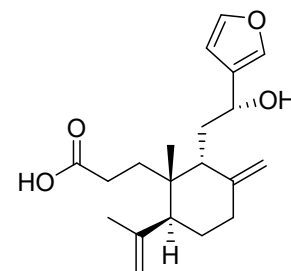

Call.12  
Syn-3,4-seco-12S-  
hydroxy-15,16-epoxy-  
4(18),8(17),13  
(16),14(15)-labdatetraen-  
3-oic acid

C<sub>20</sub>H<sub>28</sub>O<sub>4</sub>

332.20

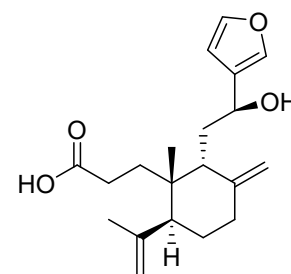

Call.13  
Nudifflopenes A

C<sub>21</sub>H<sub>32</sub>O<sub>3</sub>

332.24

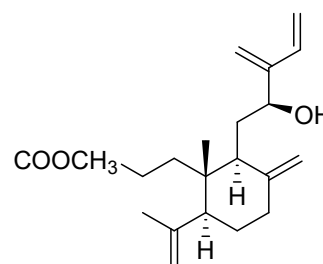

Call.14  
Nudifflopenes B

C<sub>20</sub>H<sub>30</sub>O<sub>3</sub>

318.22

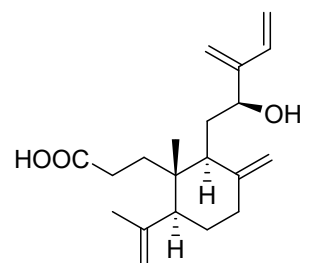

Call.15  
16,17-Dihydroxy-3-O-  
phylloladane

C<sub>20</sub>H<sub>32</sub>O<sub>3</sub>

320.24

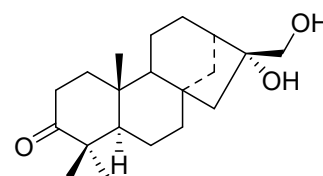

|         |                 |                                                |        |  |
|---------|-----------------|------------------------------------------------|--------|--|
| Call.16 | Nudiflophenes D | C <sub>18</sub> H <sub>30</sub> O <sub>4</sub> | 310.21 |  |
| Call.17 | Nudiflophenes M | C <sub>21</sub> H <sub>28</sub> O <sub>4</sub> | 344.20 |  |
| Call.18 | Nudiflophenes F | C <sub>21</sub> H <sub>30</sub> O <sub>4</sub> | 346.21 |  |
| Call.19 | Nudiflophenes G | C <sub>21</sub> H <sub>30</sub> O <sub>4</sub> | 346.21 |  |
| Call.20 | Nudiflophenes H | C <sub>20</sub> H <sub>26</sub> O <sub>4</sub> | 330.18 |  |

Call.21 Nudiflophenes I C<sub>21</sub>H<sub>34</sub>O<sub>3</sub> 334.25

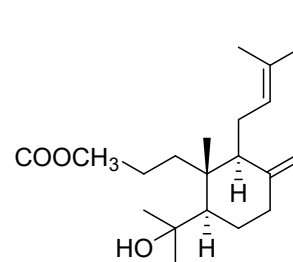

Call.22 Maravuic acid C<sub>20</sub>H<sub>30</sub>O<sub>2</sub> 302.22

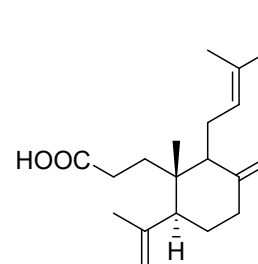

Call.23 Nudiflophenes J C<sub>19</sub>H<sub>28</sub>O<sub>3</sub> 304.20

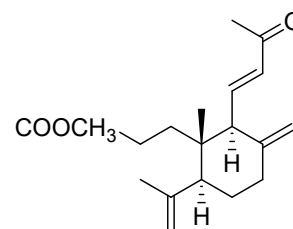

Call.24 5-Hydroxy-3,7,4'-trimethoxyflavone C<sub>18</sub>H<sub>16</sub>O<sub>6</sub> 328.09

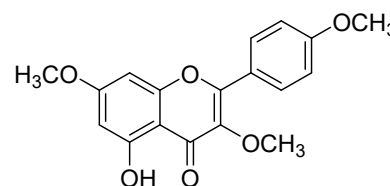

Call.25 Nudiflophenes E C<sub>19</sub>H<sub>32</sub>O<sub>4</sub> 324.23

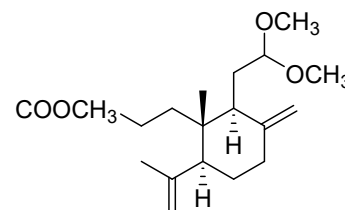

Call.26 Nudiflophenes L C<sub>18</sub>H<sub>28</sub>O<sub>3</sub> 292.20

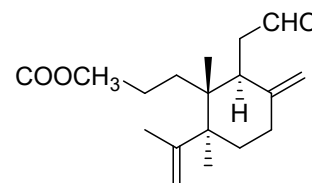

**Supplementary Table 3. Matching degree of the test set compounds predicted by the 10 pharmacophore models.**

| <b>Compound<br/>NO</b> | <b>01</b> | <b>02</b> | <b>03</b> | <b>04</b> | <b>05</b> | <b>06</b> | <b>07</b> | <b>08</b> | <b>09</b> | <b>10</b> |
|------------------------|-----------|-----------|-----------|-----------|-----------|-----------|-----------|-----------|-----------|-----------|
| Int-01                 | 3.9625    | 0.65945   | 1.18796   | 3.91613   | 3.19639   | 0.25925   | 1.2866    | 3.82654   | 0.43834   | 3.98766   |
| Int-02                 | 3.76901   | 1.67219   | 2.2906    | 3.93413   | 2.239     | 2.20579   | 1.2296    | 2.12656   | 2.25124   | 2.33345   |
| Int-03                 | 3.98766   | 1.44859   | 2.03972   | 3.80143   | 1.98309   | 2.17139   | 1.10379   | 1.91912   | 2.39457   | 2.28772   |
| Int-04                 | 2.30598   | 1.37146   | 0.102987  | 3.12501   | 2.33882   | 2.24423   | 3.24954   | 1.32004   | 0.977881  | 0.571884  |
| Int-05                 | 0.71122   | 3.40324   | 3.592     | 1.54423   | 2.79911   | 2.68718   | 0.42824   | 3.38519   | 2.43606   | 2.55252   |
| Int-06                 | 1.82858   | 0.49892   | 3.14941   | 3.85981   | 2.0913    | 2.5317    | 1.37478   | 3.28597   | 3.18324   | 2.92272   |
| Int-07                 | 1.72381   | 3.41422   | 2.62755   | 1.04385   | 1.23636   | 2.6167    | 1.73441   | 1.30561   | 3.92842   | 3.03839   |
| Int-08                 | 3.57653   | 2.41422   | 0.88855   | 1.74395   | 1.76555   | 2.3085    | 1.97925   | 2.20982   | 3.92842   | 2.12939   |
| Int-09                 | 0.90094   | 1.42402   | 2.62766   | 2.94485   | 2.05132   | 1.80937   | 2.33539   | 1.00561   | 0.82832   | 1.11837   |
| Int-10                 | 2.40709   | 1.80078   | 2.75906   | 3.19004   | 2.81573   | 2.67785   | 2.31056   | 3.1489    | 3.33791   | 3.4629    |
| Int-11                 | 3.16004   | 1.80112   | 3.15906   | 2.91195   | 2.1356    | 2.58894   | 2.23714   | 2.52124   | 2.99339   | 3.24629   |
| Int-12                 | 0.12409   | 1.57653   | 3.11555   | 2.72395   | 2.1728    | 2.38998   | 1.4288    | 2.84429   | 3.50444   | 3.15449   |
| Int-13                 | 3.11315   | 1.90094   | 3.21516   | 3.03933   | 2.53714   | 2.64252   | 3.01965   | 2.35095   | 3.43486   | 3.60293   |
| Int-14                 | 2.95962   | 1.78932   | 3.04463   | 3.21488   | 1.97068   | 2.18611   | 2.00125   | 1.16105   | 3.65769   | 3.41952   |
| Int-15                 | 3.79196   | 2.00706   | 2.90067   | 2.72521   | 3.11684   | 2.55888   | 2.94044   | 1.37123   | 2.75737   | 2.94364   |
| Int-16                 | 3.90969   | 3.35443   | 3.57514   | 3.64667   | 2.37883   | 2.60261   | 2.27789   | 3.38256   | 3.83756   | 3.6764    |
| Int-17                 | 1.61287   | 0.734     | 2.2414    | 2.46882   | 1.74164   | 2.28845   | 2.09611   | 1.10532   | 3.68493   | 2.08422   |
| Int-18                 | 1.93824   | 1.02205   | 1.33054   | 0.640566  | 2.34411   | 2.62902   | 2.31717   | 3.22565   | 3.50321   | 0.669873  |
| Int-19                 | 2.22125   | 0.778     | 2.12968   | 2.01839   | 1.86682   | 1.28808   | 2.01914   | 0.11238   | 1.9591    | 1.87823   |
| Int-20                 | 1.53505   | 1.129     | 1.32367   | 1.6572    | 2.6538    | 3.89412   | 0.8565    | 2.14176   | 3.56622   | 3.39215   |
| Int-21                 | 3.33508   | 3.47246   | 3.1939    | 2.22511   | 3.43879   | 3.34423   | 1.25054   | 2.39119   | 2.98892   | 1.5819    |
| Int-22                 | 3.40324   | 2.68718   | 0.42824   | 3.38519   | 2.43606   | 2.55252   | 2.71122   | 3.28597   | 1.54423   | 2.79911   |
| Int-23                 | 1.49892   | 2.5317    | 1.74478   | 3.592     | 3.18324   | 2.92272   | 1.82858   | 1.32004   | 3.85981   | 2.0913    |
| Int-24                 | 1.37146   | 2.24423   | 3.24954   | 3.1941    | 1.977881  | 0.57188   | 2.30598   | 3.38519   | 2.32501   | 3.93882   |
| Int-25                 | 3.40324   | 2.68718   | 0.42824   | 0.102987  | 2.43606   | 2.55252   | 0.71932   | 3.28597   | 1.54423   | 2.79911   |
| Int-26                 | 0.49892   | 2.5317    | 1.37478   | 3.592     | 3.18324   | 2.92272   | 3.82858   | 3.38519   | 3.85981   | 2.2313    |

**Supplementary Table 4. Molecular docking results.**

| Compound                                                                     | Protein             | Libdock score | Binding energy (kcal/mol) | Ligand energy (kcal/mol) | Protein energy (kcal/mol) | Complex energy (kcal/mol) |
|------------------------------------------------------------------------------|---------------------|---------------|---------------------------|--------------------------|---------------------------|---------------------------|
| ent 3,4-seco-16-hydroxy-12,15-epoxy-4(18),8(17),12,14-Labdatriene-3-oic acid | interleukin-6(6CQ5) | 94.7441       | -9.64                     | 39.5681                  | -19026.6085               | -19156.8426               |
| Nudifllophenes C                                                             | interleukin-6(6CQ5) | 96.3626       | -9.84                     | 34.2619                  | -19026.6085               | -19346.6810               |
| 5-hydroxy-3,7,4'-trimethoxyflavone                                           | interleukin-6(6CQ5) | 96.9272       | -11.64                    | 49.6250                  | -19026.6085               | -19415.2729               |
| NudifllophenesM                                                              | interleukin-6(6CQ5) | 95.9583       | -3.27                     | 62.3906                  | -19026.6085               | -19156.6197               |



**Supplementary Figures 1. Structural formulae of 26 training set compounds.**

Supplementary Material

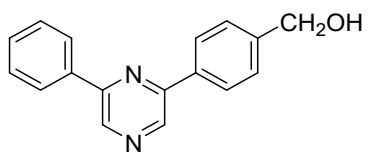

Int-1 IC<sub>50</sub>=68μM

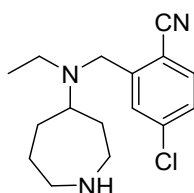

Int-2(IC<sub>50</sub>=660nM)

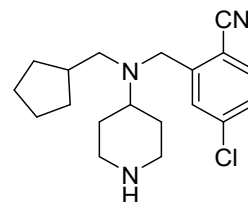

Int-3(IC<sub>50</sub>=1500nM)

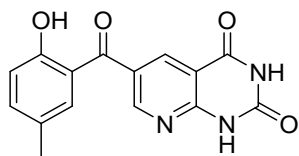

Int-4 IC<sub>50</sub>=0.16μM

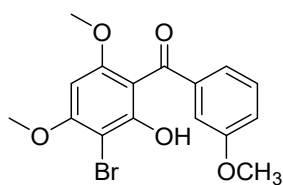

Int-5 IC<sub>50</sub>=82μM

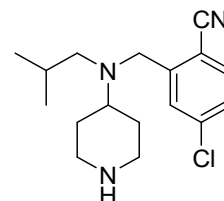

Int-6 (IC<sub>50</sub>=32nM)

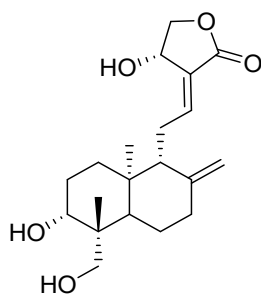

Int-7 IC<sub>50</sub>=56μM

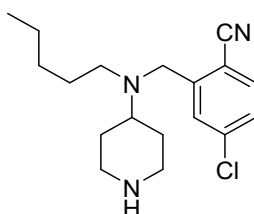

Int-8(IC<sub>50</sub>=570nM)

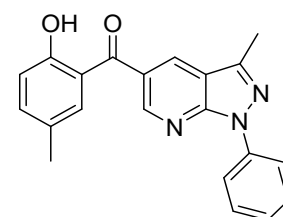

Int-9 IC<sub>50</sub>=0.16μM

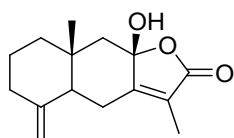

Int-10 IC<sub>50</sub>=2μM

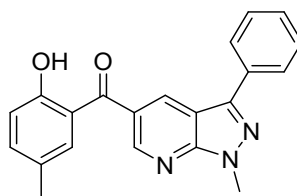

Int-11 IC<sub>50</sub>=0.16μM

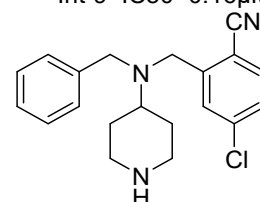

Int-12(IC<sub>50</sub>=660nM)

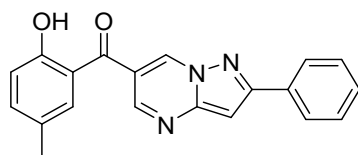

Int-13 IC<sub>50</sub>=0.16μM

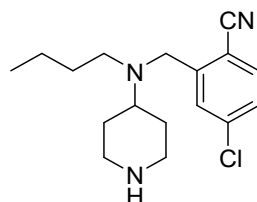

Int-14(IC<sub>50</sub>=130nM)

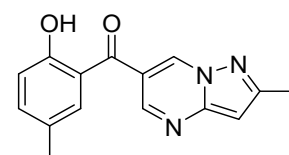

Int-15 IC<sub>50</sub>=0.16μM

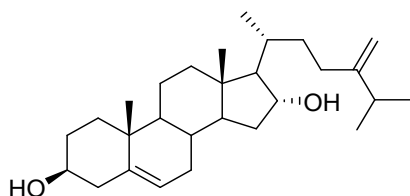

Int-16 IC<sub>50</sub>=5.2μM

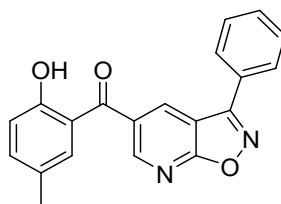

Int-17 IC<sub>50</sub>=0.16μM

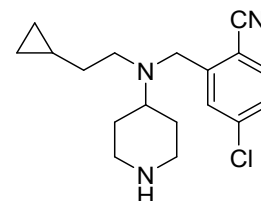

Int-18(IC<sub>50</sub>=160nM)

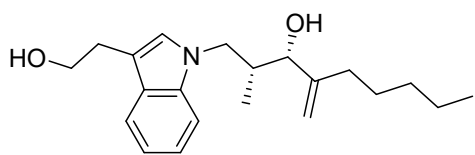

Int-19 IC<sub>50</sub>=6.83μM

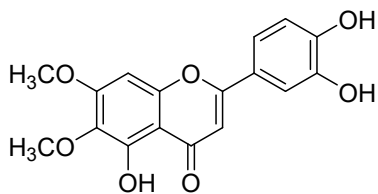

Int-20 IC<sub>50</sub>=80μM

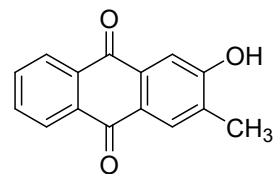

Int-21 IC<sub>50</sub>=60μM

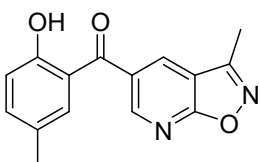

Int-22 IC<sub>50</sub>=0.16μM

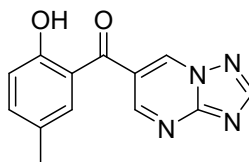

Int-23 IC<sub>50</sub>=0.16μM

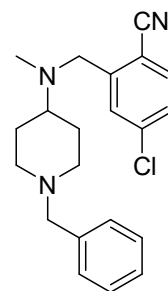

Int-24(IC<sub>50</sub>=270nM)

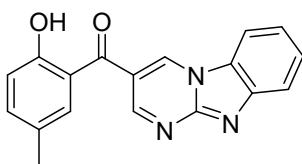

Int-25 IC<sub>50</sub>=0.16μM

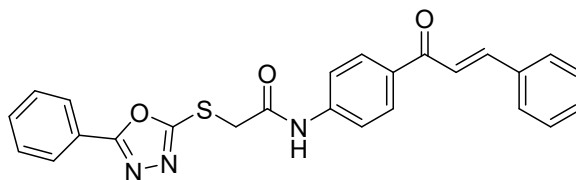

Int-26 IC<sub>50</sub>=82μM

**Supplementary Figures 2. Structural formulae of 26 test set compounds.**

Supplementary Material

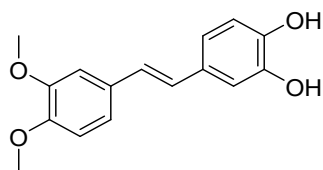

Nit-1 (IC<sub>50</sub>=80nM)

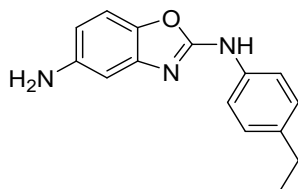

Nit-2 (IC<sub>50</sub>=18.9nM)

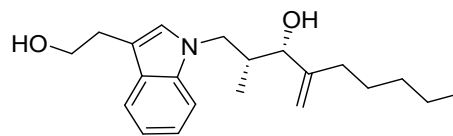

Nit-3 (IC<sub>50</sub>=6.83μM)

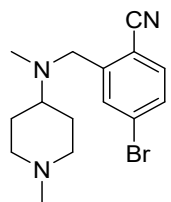

Nit-4 (IC<sub>50</sub>=210nM)

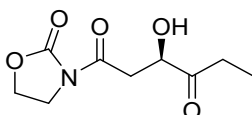

Nit-5 (IC<sub>50</sub>=100μM)

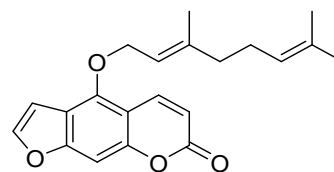

Nit-6 (IC<sub>50</sub>=1400nM)

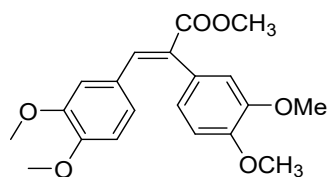

Nit-7 (IC<sub>50</sub>=5050nM)

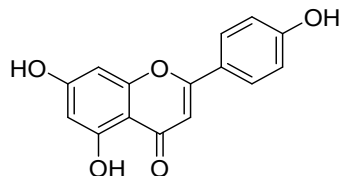

Nit-8 (IC<sub>50</sub>=6860nM)

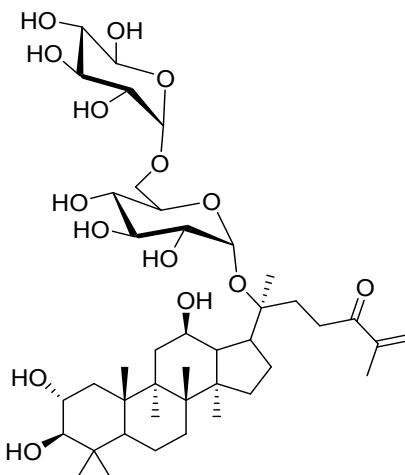

Nit-11 (IC<sub>50</sub>=270nM)

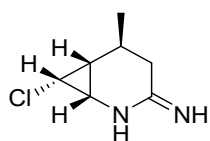

Nit-9 (IC<sub>50</sub>=2300nM)

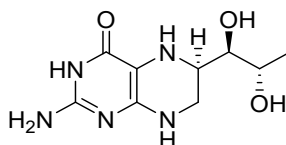

Nit-10 (IC<sub>50</sub>=250nM)

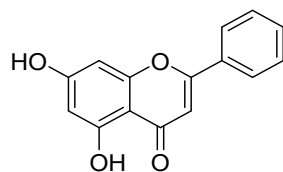

Nit-12 IC<sub>50</sub>=56μM

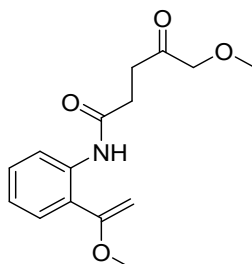

Nit-13 IC<sub>50</sub>=10μM

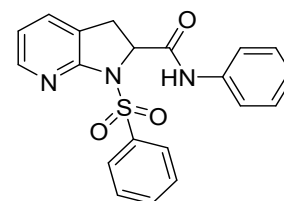

Nit-14 (IC<sub>50</sub>=100nM)

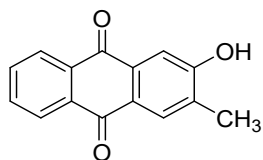

Nit-15 IC<sub>50</sub>=73.8μM

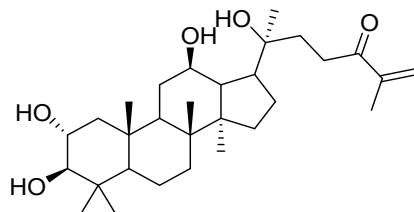

Nit-16 IC<sub>50</sub>=0.59μM

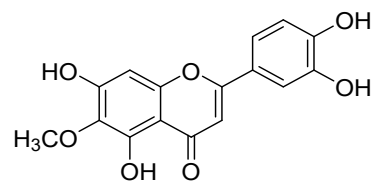

Nit-17 IC<sub>50</sub>=68.8μM

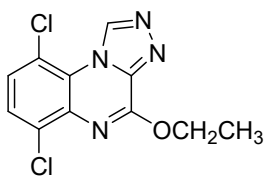

Nit-18 IC<sub>50</sub>=46.4μM

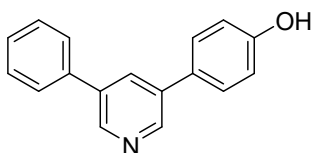

Nit-19 IC<sub>50</sub>=73μM

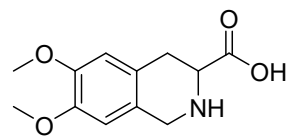

Nit-20 IC<sub>50</sub>=10μM

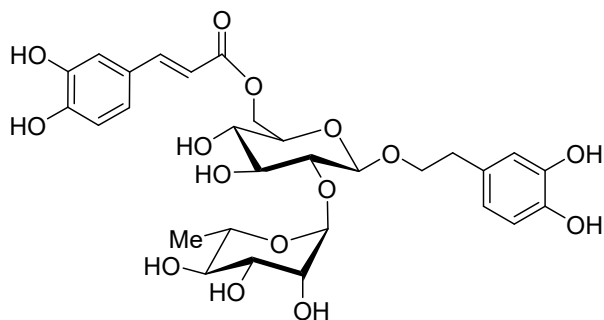

Nit-22

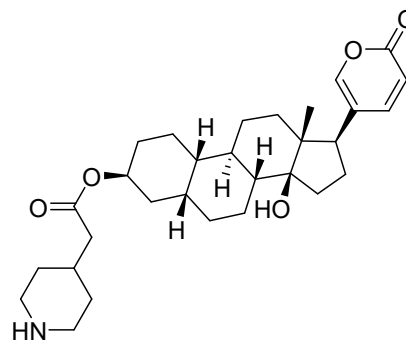

Nit-21 IC<sub>50</sub>=82μM

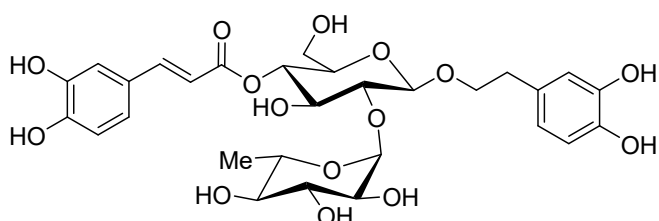

Nit-23

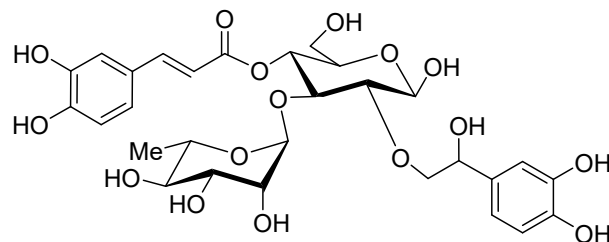

Nit-24

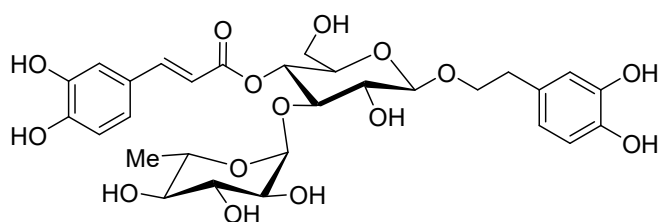

Nit-25

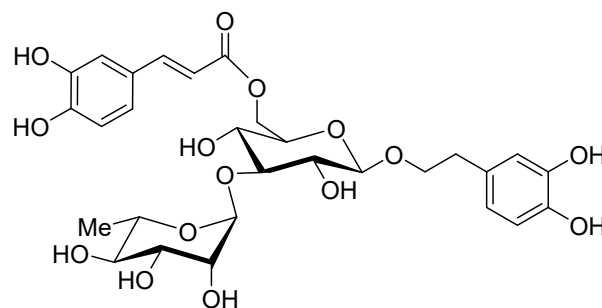

Nit-26
